# Supplementary material for: Short-Term Memory Affects Color Perception in Context
Source: PubMed Central journal article supplement (PMC3903542; doi:10.1371/journal.pone.0086488), 2014-01-27
Supplement: pone.0086488.s003.pdf [file pone.0086488.s003.pdf]

**Table S1:** Mean CIE 1931 xyY and CIE L\*a\*b\* values of the three reference stimuli. Y and L\* values correspond to the mean of the normal distribution from which the luminances were sampled for each check in the stimulus. L\*a\*b\* values have been calculated based on the neutral background (see Table S2).

| Color appearance | hue angle (rad) | x     | y     | Y (cd/m <sup>2</sup> ) | a*    | b*   | L*  |
|------------------|-----------------|-------|-------|------------------------|-------|------|-----|
| Yellowish-green  | 2.44            | 0.314 | 0.399 | 15                     | -30.6 | 25.7 | 100 |
| Green            | 2.62            | 0.299 | 0.391 | 15                     | -34.6 | 20   | 100 |
| Bluish-green     | 2.79            | 0.286 | 0.380 | 15                     | -37.6 | 13.7 | 100 |
