# Supplementary material for: Short-Term Memory Affects Color Perception in Context
Source: PubMed Central journal article supplement (PMC3903542; doi:10.1371/journal.pone.0086488), 2014-01-27
Supplement: pone.0086488.s004.pdf [file pone.0086488.s004.pdf]

**Table S2:** Mean CIE 1931 values and correlated color temperatures of the two backgrounds.

| Color appearance | x     | y     | Y  | K     |
|------------------|-------|-------|----|-------|
| Neutral          | 0.313 | 0.329 | 15 | 6500  |
| Bluish           | 0.279 | 0.391 | 15 | 10000 |
